# Supplementary material
Source: publisher figshare collection journal article supplement (https://future-science-group.figshare.com/ndownloader/files/28531608)
Supplement: Supplementary file 1 [file 28531608]

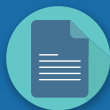

## Phase 1 study protocol: NKTR-255 as monotherapy or combined with daratumumab or rituximab in hematologic malignancies

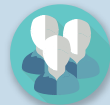

### Authors

Nina Shah, Miguel-Angel Perales, Cameron J Turtle, Mitchell S Cairo, Andrew J Cowan, Hayder Saeed, Lihua E Budde, Alan Tan, Zachary Lee, Kazuharu Kai, Mario Q Marcondes, Jonathan Zalevsky, Mary A Tagliaferri & Krina K Patel

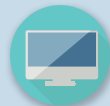

### Article URL

[www.futuremedicine.com/doi/10.2217/fon-2021-0576](http://www.futuremedicine.com/doi/10.2217/fon-2021-0576)

### Trial registration number

NCT04136756

## Study Outcomes

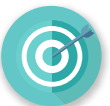

### Primary outcomes

Dose-escalation phase: safety and tolerability, MTD and RP2D of NKTR-255 monotherapy

Dose-expansion phase: safety and tolerability of:

- NKTR-255 monotherapy in patients who have progressed on a CAR-T therapy with relapsed/refractory MM, NHL or iNHL
- NKTR-255 plus daratumumab in patients with relapsed/refractory MM
- NKTR-255 plus rituximab in patients with relapsed/refractory iNHL

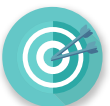

### Secondary key outcomes

ORR, PK, and PD of NKTR-255 monotherapy and in combination with daratumumab or rituximab

## Key Eligibility Criteria

≥18

Aged ≥18 years

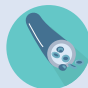

Relapsed/refractory MM or NHL with progressive disease on/after their last regimen

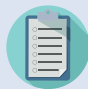

ECOG PS ≤ 2

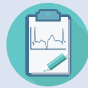

Response to at least 1 prior line of treatment

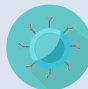

All patients who received prior investigational CAR-T are eligible after confirmation of relapse of their primary disease

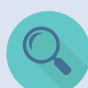

Patients with MM: measurable disease (defined by the IMWG criteria) with ≥ 3 prior lines of therapy with no other available treatment options

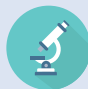

Patients with NHL or iNHL: histologically confirmed CD19-/CD20-positive disease

## Study Design and Treatment

P1

Phase 1

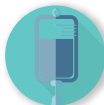

Open label

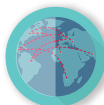

Multicenter

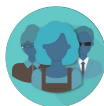

### DOSE ESCALATION

Increasing doses of NKTR-255 (starting dose 1.5µg/kg IV q21d) until the MTD or RP2D is reached

RP2D  
characterization  
n≈6

### DOSE EXPANSION<sup>a</sup>

**COHORT A (n≈12)**  
Relapsed/refractory NHL NKTR-255

**COHORT B1 (n≈12)**  
Relapsed/refractory MM NKTR-255<sup>b</sup>

**COHORT B2 (n≈17)**  
Relapsed/refractory MM NKTR-255 + daratumumab

**COHORT C1 (n≈12)**  
Relapsed/refractory iNHL NKTR-255<sup>b</sup>

**COHORT C2 (n≈19)**  
Relapsed/refractory iNHL NKTR-255 + rituximab

END OF TREATMENT

<sup>a</sup>During dose expansion patients will be treated with NKTR-255 at the RP2D at either every 21- or 28-day dosing schedule

<sup>b</sup>Patients in Cohorts B1 and C1 who fail to respond to treatment are permitted to cross over to the combination Cohorts B2 and C2, respectively, after at least one disease assessment

## Glossary

CAR-T: Chimeric antigen receptor T cell; ECOG PS: Eastern Cooperative Oncology Group Performance Status; IMWG: International Myeloma Working Group; iNHL: Indolent non-Hodgkin lymphoma; IV: Intravenously; MM: Multiple myeloma; MTD: Maximum tolerated dose; NHL: Non-Hodgkin lymphoma; ORR: Objective response rate; PD: Pharmacodynamics; PK: Pharmacokinetics; q21d: Every 21 days; RP2D: Recommended Phase 2 dose
